# Supplementary material for: Better Prognosis of Gastric Neuroendocrine Carcinoma Than Gastric Adenocarcinoma among Whites in the United States: A Propensity Score Matching Analysis Based on SEER
Source: MDPI journal article supplement (doi:10.3390/curroncol29070387), 2022-07-11
Supplement: s1 [file s1]

## **SUPPLEMENT.**

**Supplementary Table S1.** Baseline Clinicopathologic Characteristics of White Patients with Early Stage Gastric Neuroendocrine Carcinoma and Adenocarcinoma in the Unmatched Data

**Supplementary Table S2.** Baseline Clinicopathologic Characteristics of White Patients with Early Stage Gastric Neuroendocrine Carcinoma and Adenocarcinoma in the Matched Data

**Supplementary Table S3.** Univariable and Multivariable Cox Regression Analyses of Factors Associated with Overall Survival of White Patients with Early Stage Gastric Neuroendocrine Carcinoma and Adenocarcinoma in the Matched Data

**Supplementary Table S4.** Univariable and Multivariable Cox Regression Analyses of Factors Associated with Cancer-specific Survival of White Patients with Early Stage Gastric Neuroendocrine Carcinoma and Adenocarcinoma in the Matched Data

**Supplementary Table S5.** Baseline Clinicopathologic Characteristics of White Patients with Locally Advanced Stage Gastric Neuroendocrine Carcinoma and Adenocarcinoma in the Unmatched Data

**Supplementary Table S6.** Baseline Clinicopathologic Characteristics of White Patients with Locally Advanced Stage Gastric Neuroendocrine Carcinoma and Adenocarcinoma in the Matched Data

**Supplementary Table S7.** Univariable and Multivariable Cox Regression Analyses of Factors Associated with Overall Survival of White Patients with Locally Advanced Stage Gastric Neuroendocrine Carcinoma and Adenocarcinoma in the Matched Data

**Supplementary Table S8.** Univariable and Multivariable Cox Regression Analyses of Factors Associated with Cancer-specific Survival of White Patients with Locally Advanced Stage Gastric Neuroendocrine Carcinoma and Adenocarcinoma in the Matched Data

**Supplementary Table S9.** Baseline Clinicopathologic Characteristics of White Patients with Distant Metastatic Stage Gastric Neuroendocrine Carcinoma and Adenocarcinoma in the Unmatched Data

**Supplementary Table S10.** Baseline Clinicopathologic Characteristics of White Patients with Distant Metastatic Stage Gastric Neuroendocrine Carcinoma and Adenocarcinoma in the Matched Data

**Supplementary Table S11.** Univariable and Multivariable Cox Regression Analyses of Factors Associated with Overall Survival of White Patients with Distant Metastatic Stage Gastric Neuroendocrine Carcinoma and Adenocarcinoma in the Matched Data

**Supplementary Table S12.** Univariable and Multivariable Cox Regression Analyses of Factors Associated with Cancer-specific Survival of White Patients with Distant Metastatic Stage Gastric Neuroendocrine Carcinoma and Adenocarcinoma in the Matched Data

**Supplementary Table S13.** Baseline Clinicopathologic Characteristics of East Asian Patients with Gastric Neuroendocrine Carcinoma and Adenocarcinoma in the Unmatched Data

**Supplementary Table S14.** Baseline Clinicopathologic Characteristic of East Asian Patients with Gastric Neuroendocrine Carcinoma and Adenocarcinoma in the Matched Data

**Supplementary Figure S1.** Schematic overview for patients identification

**Supplementary Figure S2.** Kaplan Meier Survival Curves for East Asian Patients with Gastric Neuroendocrine Carcinoma and Adenocarcinoma before (A: OS; B: CSS) and after PSM (C: OS; D: CSS)

| Supplementary Table S1. Baseline Clinicopathologic Characteristics of White Patients with Early Stage Gastric Neuroendocrine Carcinoma and Adenocarcinoma in the Unmatched Data |                      |                      |        |
|---------------------------------------------------------------------------------------------------------------------------------------------------------------------------------|----------------------|----------------------|--------|
|                                                                                                                                                                                 | No. (%)<br>NEC (114) | No. (%)<br>AC (2239) | P      |
| <b>Characteristic</b>                                                                                                                                                           |                      |                      |        |
| <b>Age, median (IQR)</b>                                                                                                                                                        | 60.50 (50.75-70.25)  | 72 (62-80)           | <0.001 |
| <b>Sex</b>                                                                                                                                                                      |                      |                      | <0.001 |
| Men                                                                                                                                                                             | 39 (34.2)            | 1495 (66.8)          |        |
| Women                                                                                                                                                                           | 75 (65.8)            | 744 (33.2)           |        |
| <b>Tumor location</b>                                                                                                                                                           |                      |                      | <0.001 |
| Proximal                                                                                                                                                                        | 14 (12.3)            | 1172 (52.3)          |        |
| Middle                                                                                                                                                                          | 61 (53.5)            | 452 (20.2)           |        |
| Distal                                                                                                                                                                          | 11 (9.6)             | 436 (19.5)           |        |
| Mix                                                                                                                                                                             | 1 (0.9)              | 65 (2.9)             |        |
| Unknown                                                                                                                                                                         | 27 (23.7)            | 114 (5.1)            |        |
| <b>Tumor size, median (IQR), cm</b>                                                                                                                                             | 0.5 (0.375-1.0)      | 2.0 (1.0-3.1)        | <0.001 |
| <b>Surgery</b>                                                                                                                                                                  |                      |                      | 0.179  |
| No                                                                                                                                                                              | 17 (14.9)            | 449 (20.1)           |        |
| Yes                                                                                                                                                                             | 97 (85.1)            | 1790 (79.9)          |        |
| <b>Receiving chemotherapy or/and radiotherapy</b>                                                                                                                               |                      |                      | <0.001 |
| No                                                                                                                                                                              | 112 (98.2)           | 1843 (82.3)          |        |
| Yes                                                                                                                                                                             | 2 (1.8)              | 396 (17.7)           |        |

| Supplementary Table S2. Baseline Clinicopathologic Characteristics of White Patients with Early Stage Gastric Neuroendocrine Carcinoma and Adenocarcinoma in the Matched Data |                     |                     |        |
|-------------------------------------------------------------------------------------------------------------------------------------------------------------------------------|---------------------|---------------------|--------|
|                                                                                                                                                                               | No. (%)<br>NEC (96) | No. (%)<br>AC (263) | P      |
| <b>Characteristic</b>                                                                                                                                                         |                     |                     |        |
| <b>Age, median (IQR)</b>                                                                                                                                                      | 62.50 (53.25-71)    | 63 (55-71)          | 0.426  |
| <b>Sex</b>                                                                                                                                                                    |                     |                     | 0.566  |
| Men                                                                                                                                                                           | 38 (39.6)           | 113 (43.0)          |        |
| Women                                                                                                                                                                         | 58 (60.4)           | 150 (57.0)          |        |
| <b>Tumor location</b>                                                                                                                                                         |                     |                     | <0.001 |
| Proximal                                                                                                                                                                      | 10 (10.4)           | 151 (57.4)          |        |
| Middle                                                                                                                                                                        | 53 (55.2)           | 38 (14.4)           |        |
| Distal                                                                                                                                                                        | 7 (7.3)             | 55 (20.9)           |        |
| Mix                                                                                                                                                                           | 1 (1.0)             | 5 (1.9)             |        |
| Unknown                                                                                                                                                                       | 25 (26.1)           | 14 (5.4)            |        |
| <b>Tumor size, median (IQR), cm</b>                                                                                                                                           | 0.6 (0.4-1.0)       | 0.9 (0.4-1.5)       | 0.001  |
| <b>Surgery</b>                                                                                                                                                                |                     |                     | 0.674  |
| No                                                                                                                                                                            | 9 (9.4)             | 21 (8.0)            |        |
| Yes                                                                                                                                                                           | 87 (90.6)           | 242 (92.0)          |        |
| <b>Receiving chemotherapy or/and radiotherapy</b>                                                                                                                             |                     |                     | 1.000  |
| No                                                                                                                                                                            | 94 (97.9)           | 257 (97.7)          |        |
| Yes                                                                                                                                                                           | 2 (2.1)             | 6 (2.3)             |        |

**Supplementary Table S3. Univariable and Multivariable Cox Regression Analyses of Factors Associated with Overall Survival of White Patients with Early Stage Gastric Neuroendocrine Carcinoma and Adenocarcinoma in the Matched Data**

| Clinicopathological features                      | Univariable analysis  |        | Multivariable analysis |        |
|---------------------------------------------------|-----------------------|--------|------------------------|--------|
|                                                   | HR (95% CI)           | P      | HR (95% CI)            | P      |
| <b>Age</b>                                        | 1.069 (1.046, 1.092)  | <0.001 | 1.062 (1.038, 1.087)   | <0.001 |
| <b>Sex</b>                                        |                       |        |                        |        |
| Men                                               | 1[Reference]          |        | 1[Reference]           |        |
| Women                                             | 0.687 (0.450, 1.049)  | 0.082  | 0.816 (0.515, 1.291)   | 0.384  |
| <b>Tumor location</b>                             |                       |        |                        |        |
| Proximal                                          | 1[Reference]          |        | NA                     | NA     |
| Middle                                            | 0.949 (0.551, 1.634)  | 0.851  |                        |        |
| Distal                                            | 0.996 (0.559, 1.773)  | 0.988  |                        |        |
| Mix                                               | 1.726 (0.416, 7.161)  | 0.452  |                        |        |
| Unknown                                           | 0.755 (0.338, 1.686)  | 0.494  |                        |        |
| <b>Tumor size</b>                                 | 1.007 (1.004, 1.010)  | <0.001 | 1.007 (1.003, 1.011)   | <0.001 |
| <b>Surgery</b>                                    |                       |        |                        |        |
| No                                                | 1[Reference]          |        | 1[Reference]           |        |
| Yes                                               | 0.130 (0.078, 0.217)  | <0.001 | 0.148 (0.079, 0.279)   | <0.001 |
| <b>Receiving chemotherapy or/and radiotherapy</b> |                       |        |                        |        |
| No                                                | 1[Reference]          |        | 1[Reference]           |        |
| Yes                                               | 6.536 (2.996, 14.256) | <0.001 | 0.403 (0.151, 1.076)   | 0.070  |
| <b>Type</b>                                       |                       |        |                        |        |
| AC                                                | 1[Reference]          |        | 1[Reference]           |        |
| GNEC                                              | 0.610 (0.337, 1.102)  | 0.102  | 0.528 (0.280, 0.996)   | 0.049  |

**Supplementary Table S4. Univariable and Multivariable Cox Regression Analyses of Factors Associated with Cancer-specific Survival of White Patients with Early Stage Gastric Neuroendocrine Carcinoma and Adenocarcinoma in the Matched Data**

| Clinicopathological features                      | Univariable analysis  |        | Multivariable analysis |        |
|---------------------------------------------------|-----------------------|--------|------------------------|--------|
|                                                   | HR (95% CI)           | P      | HR (95% CI)            | P      |
| <b>Age</b>                                        | 1.057 (1.024, 1.092)  | 0.001  | 1.044 (1.006, 1.083)   | 0.024  |
| <b>Sex</b>                                        |                       |        |                        |        |
| Men                                               | 1[Reference]          |        | 1[Reference]           |        |
| Women                                             | 0.512 (0.267, 0.983)  | 0.044  | 0.705 (0.346, 1.437)   | 0.336  |
| <b>Tumor location</b>                             |                       |        |                        |        |
| Proximal                                          | 1[Reference]          |        | NA                     | NA     |
| Middle                                            | 0.549 (0.222, 1.355)  | 0.193  |                        |        |
| Distal                                            | 0.713 (0.289, 1.759)  | 0.463  |                        |        |
| Mix                                               | 1.587 (0.213, 11.840) | 0.652  |                        |        |
| Unknown                                           | 0.423 (0.099, 1.798)  | 0.244  |                        |        |
| <b>Tumor size</b>                                 | 1.007 (1.003, 1.011)  | 0.002  | 1.008 (1.002, 1.015)   | 0.012  |
| <b>Surgery</b>                                    |                       |        |                        |        |
| No                                                | 1[Reference]          |        | 1[Reference]           |        |
| Yes                                               | 0.085 (0.042, 0.171)  | <0.001 | 0.098 (0.043, 0.225)   | <0.001 |
| <b>Receiving chemotherapy or/and radiotherapy</b> |                       |        |                        |        |
| No                                                | 1[Reference]          |        | 1[Reference]           |        |
| Yes                                               | 7.632 (2.678, 21.751) | <0.001 | 0.382 (0.106, 1.377)   | 0.141  |
| <b>Type</b>                                       |                       |        |                        |        |
| AC                                                | 1[Reference]          |        | 1[Reference]           |        |
| GNEC                                              | 0.390 (0.138, 1.104)  | 0.076  | 0.319 (0.105, 0.970)   | 0.044  |

**Supplementary Table S5. Baseline Clinicopathologic Characteristics of White Patients with Locally Advanced Stage Gastric Neuroendocrine Carcinoma and Adenocarcinoma in the Unmatched Data**

|                                                   | No. (%)<br>NEC (177) | No. (%)<br>AC (8138) | P      |
|---------------------------------------------------|----------------------|----------------------|--------|
| <b>Characteristic</b>                             |                      |                      |        |
| <b>Age, median (IQR)</b>                          | 65 (53-73)           | 68 (59-77)           | <0.001 |
| <b>Sex</b>                                        |                      |                      | 0.002  |
| Men                                               | 106 (59.9)           | 5757 (70.7)          |        |
| Women                                             | 71 (40.1)            | 2381 (29.3)          |        |
| <b>Tumor location</b>                             |                      |                      | <0.001 |
| Proximal                                          | 65 (36.7)            | 4288 (52.7)          |        |
| Middle                                            | 54 (30.5)            | 1574 (19.3)          |        |
| Distal                                            | 24 (13.6)            | 1385 (17.0)          |        |
| Mix                                               | 11 (6.2)             | 472 (5.8)            |        |
| Unknown                                           | 23 (13.0)            | 419 (5.1)            |        |
| <b>Tumor size, median (IQR), cm</b>               | 3.0 (1.55-6.0)       | 3.0 (4.5-6.4)        | <0.001 |
| <b>T stage</b>                                    |                      |                      | <0.001 |
| 1                                                 | 17 (9.6)             | 502 (6.2)            |        |
| 2                                                 | 71 (40.1)            | 1465 (18.0)          |        |
| 3                                                 | 60 (33.9)            | 4139 (50.9)          |        |
| 4a                                                | 20 (11.3)            | 1433 (17.6)          |        |
| 4b                                                | 9 (5.1)              | 599 (7.4)            |        |
| <b>N stage</b>                                    |                      |                      | <0.001 |
| 0                                                 | 84 (47.5)            | 2357 (29.0)          |        |
| 1                                                 | 61 (34.5)            | 2839 (34.9)          |        |
| 2                                                 | 19 (10.7)            | 1568 (19.3)          |        |
| 3a                                                | 10 (5.6)             | 1036 (12.7)          |        |
| 3b                                                | 3 (1.7)              | 338 (4.2)            |        |
| <b>TNM stage</b>                                  |                      |                      | <0.001 |
| Ib                                                | 69 (39.0)            | 1159 (14.2)          |        |
| II                                                | 68 (38.4)            | 3540 (43.5)          |        |
| III                                               | 40 (22.6)            | 3439 (42.3)          |        |
| <b>Surgery</b>                                    |                      |                      | 0.667  |
| No                                                | 34 (19.2)            | 1461 (18.0)          |        |
| Yes                                               | 143 (80.8)           | 6677 (82.0)          |        |
| <b>Receiving chemotherapy or/and radiotherapy</b> |                      |                      | <0.001 |
| No                                                | 115 (65.0)           | 2605 (32.0)          |        |
| Yes                                               | 62 (35.0)            | 5533 (68.0)          |        |

**Supplementary Table S6. Baseline Clinicopathologic Characteristics of White Patients with Locally Advanced Stage Gastric Neuroendocrine Carcinoma and Adenocarcinoma in the Matched Data**

|                                                   | No. (%)<br>NEC (159) | No. (%)<br>AC (428) | P      |
|---------------------------------------------------|----------------------|---------------------|--------|
| <b>Characteristic</b>                             |                      |                     |        |
| <b>Age, median (IQR)</b>                          | 66 (55-75)           | 67 (58-75)          | 0.174  |
| <b>Sex</b>                                        |                      |                     | 0.384  |
| Men                                               | 99 (62.3)            | 283 (66.1)          |        |
| Women                                             | 60 (37.7)            | 145 (33.9)          |        |
| <b>Tumor location</b>                             |                      |                     | <0.001 |
| Proximal                                          | 60 (37.7)            | 242 (56.5)          |        |
| Middle                                            | 46 (28.9)            | 90 (21.0)           |        |
| Distal                                            | 22 (13.8)            | 66 (15.4)           |        |
| Mix                                               | 11 (6.9)             | 13 (3.0)            |        |
| Unknown                                           | 20 (12.6)            | 17 (4.1)            |        |
| <b>Tumor size, median (IQR), cm</b>               | 3.5 (1.8-6.0)        | 2.5 (2.0-3.6)       | <0.001 |
| <b>T stage</b>                                    |                      |                     | 0.736  |
| 1                                                 | 15 (9.4)             | 39 (9.1)            |        |
| 2                                                 | 58 (36.5)            | 138 (32.2)          |        |
| 3                                                 | 57 (35.8)            | 175 (40.9)          |        |
| 4a                                                | 20 (12.6)            | 58 (13.6)           |        |
| 4b                                                | 9 (5.7)              | 18 (4.2)            |        |
| <b>N stage</b>                                    |                      |                     | 0.692  |
| 0                                                 | 70 (44.0)            | 195 (45.6)          |        |
| 1                                                 | 57 (35.8)            | 132 (30.8)          |        |
| 2                                                 | 19 (11.9)            | 67 (15.7)           |        |
| 3a                                                | 10 (6.3)             | 28 (6.5)            |        |
| 3b                                                | 3 (1.9)              | 6 (1.4)             |        |
| <b>TNM Stage</b>                                  |                      |                     | 0.640  |
| Ib                                                | 54 (34.0)            | 128 (29.9)          |        |
| II                                                | 65 (40.9)            | 185 (43.2)          |        |
| III                                               | 40 (25.1)            | 115 (26.9)          |        |
| <b>Surgery</b>                                    |                      |                     | 0.513  |
| No                                                | 26 (16.4)            | 80 (18.7)           |        |
| Yes                                               | 133 (83.6)           | 348 (81.3)          |        |
| <b>Receiving chemotherapy or/and radiotherapy</b> |                      |                     | 0.471  |
| No                                                | 97 (61.0)            | 247 (57.7)          |        |
| Yes                                               | 62 (39.0)            | 181 (42.3)          |        |

| Supplementary Table S7. Univariable and Multivariable Cox Regression Analyses of Factors Associated with Overall Survival of White Patients with Locally Advanced Stage Gastric Neuroendocrine Carcinoma and Adenocarcinoma in the Matched Data |                      |        |                        |        |
|-------------------------------------------------------------------------------------------------------------------------------------------------------------------------------------------------------------------------------------------------|----------------------|--------|------------------------|--------|
| Clinicopathological features                                                                                                                                                                                                                    | Univariable analysis |        | Multivariable analysis |        |
|                                                                                                                                                                                                                                                 | HR (95% CI)          | P      | HR (95% CI)            | P      |
| <b>Age</b>                                                                                                                                                                                                                                      | 1.027 (1.018, 1.037) | <0.001 | 1.027 (1.018, 1.036)   | <0.001 |
| <b>Sex</b>                                                                                                                                                                                                                                      |                      |        |                        |        |
| Men                                                                                                                                                                                                                                             | 1[Reference]         |        | 1[Reference]           |        |
| Women                                                                                                                                                                                                                                           | 0.835 (0.675, 1.033) | 0.097  | 0.833 (0.665, 1.044)   | 0.113  |
| <b>Tumor location</b>                                                                                                                                                                                                                           |                      |        |                        |        |
| Proximal                                                                                                                                                                                                                                        | 1[Reference]         |        | 1[Reference]           |        |
| Middle                                                                                                                                                                                                                                          | 0.647 (0.497, 0.843) | 0.001  | 0.758 (0.572, 1.004)   | 0.054  |
| Distal                                                                                                                                                                                                                                          | 0.852 (0.640, 1.135) | 0.273  | 0.992 (0.728, 1.351)   | 0.959  |
| Mix                                                                                                                                                                                                                                             | 0.785 (0.465, 1.325) | 0.364  | 0.854 (0.496, 1.472)   | 0.570  |
| Unknown                                                                                                                                                                                                                                         | 0.594 (0.371, 0.949) | 0.030  | 0.769 (0.471, 1.254)   | 0.292  |
| <b>Tumor size</b>                                                                                                                                                                                                                               | 1.002 (1.001, 1.003) | 0.002  | 1.002 (1.001, 1.003)   | 0.006  |
| <b>T stage</b>                                                                                                                                                                                                                                  |                      |        | NA                     | NA     |
| 1                                                                                                                                                                                                                                               | 1[Reference]         |        |                        |        |
| 2                                                                                                                                                                                                                                               | 0.810 (0.549, 1.194) | 0.286  |                        |        |
| 3                                                                                                                                                                                                                                               | 1.273 (0.879, 1.845) | 0.202  |                        |        |
| 4a                                                                                                                                                                                                                                              | 1.993 (1.315, 3.020) | 0.001  |                        |        |
| 4b                                                                                                                                                                                                                                              | 2.697 (1.594, 4.562) | <0.001 |                        |        |
| <b>N stage</b>                                                                                                                                                                                                                                  |                      |        | NA                     | NA     |
| 0                                                                                                                                                                                                                                               | 1[Reference]         |        |                        |        |
| 1                                                                                                                                                                                                                                               | 1.501 (1.184, 1.902) | 0.001  |                        |        |
| 2                                                                                                                                                                                                                                               | 1.678 (1.256, 2.241) | <0.001 |                        |        |
| 3a                                                                                                                                                                                                                                              | 2.481 (1.704, 3.611) | <0.001 |                        |        |
| 3b                                                                                                                                                                                                                                              | 4.558 (2.223, 9.347) | <0.001 |                        |        |
| <b>TNM stage</b>                                                                                                                                                                                                                                |                      |        |                        |        |
| Ib                                                                                                                                                                                                                                              | 1[Reference]         |        | 1[Reference]           |        |
| II                                                                                                                                                                                                                                              | 1.519 (1.176, 1.962) | 0.001  | 1.529 (1.179, 1.983)   | 0.001  |
| III                                                                                                                                                                                                                                             | 2.597 (1.985, 3.396) | <0.001 | 2.702 (2.006, 3.639)   | <0.001 |
| <b>Surgery</b>                                                                                                                                                                                                                                  |                      |        |                        |        |
| No                                                                                                                                                                                                                                              | 1[Reference]         |        | 1[Reference]           |        |
| Yes                                                                                                                                                                                                                                             | 0.360 (0.284, 0.457) | <0.001 | 0.375 (0.282, 0.498)   | <0.001 |
| <b>Receiving chemotherapy or/and radiotherapy</b>                                                                                                                                                                                               |                      |        |                        |        |
| No                                                                                                                                                                                                                                              | 1[Reference]         |        | 1[Reference]           |        |
| Yes                                                                                                                                                                                                                                             | 1.716 (1.403, 2.099) | <0.001 | 0.900 (0.694, 1.168)   | 0.429  |
| <b>Type</b>                                                                                                                                                                                                                                     |                      |        |                        |        |
| AC                                                                                                                                                                                                                                              | 1[Reference]         |        | 1[Reference]           |        |
| GNEC                                                                                                                                                                                                                                            | 0.725 (0.570, 0.923) | 0.009  | 0.803 (0.621, 1.038)   | 0.094  |



**Supplementary Table S8. Univariable and Multivariable Cox Regression Analyses of Factors Associated with Cancer-specific Survival of White Patients with Locally Advanced Stage Gastric Neuroendocrine Carcinoma and Adenocarcinoma in the Matched Data**

| Clinicopathological features                      | Univariable analysis  |        | Multivariable analysis |        |
|---------------------------------------------------|-----------------------|--------|------------------------|--------|
|                                                   | HR (95% CI)           | P      | HR (95% CI)            | P      |
| <b>Age</b>                                        | 1.019 (1.009, 1.030)  | <0.001 | 1.019 (1.009, 1.029)   | <0.001 |
| <b>Sex</b>                                        |                       |        |                        |        |
| Men                                               | 1[Reference]          |        | 1[Reference]           |        |
| Women                                             | 0.811 (0.633, 1.039)  | 0.097  | 0.863 (0.664, 1.121)   | 0.269  |
| <b>Tumor location</b>                             |                       |        |                        |        |
| Proximal                                          | 1[Reference]          |        | 1[Reference]           |        |
| Middle                                            | 0.630 (0.465, 0.855)  | 0.003  | 0.795 (0.574, 1.100)   | 0.166  |
| Distal                                            | 0.772 (0.550, 1.083)  | 0.133  | 0.976 (0.679, 1.403)   | 0.896  |
| Mix                                               | 0.816 (0.454, 1.466)  | 0.496  | 0.958 (0.520, 1.766)   | 0.891  |
| Unknown                                           | 0.480 (0.267, 0.863)  | 0.014  | 0.710 (0.386, 1.307)   | 0.272  |
| <b>Tumor size</b>                                 | 1.002 (1.001, 1.004)  | 0.001  | 1.002 (1.001, 1.004)   | 0.004  |
| <b>T stage</b>                                    |                       |        | NA                     | NA     |
| 1                                                 | 1[Reference]          |        |                        |        |
| 2                                                 | 0.794 (0.490, 1.285)  | 0.347  |                        |        |
| 3                                                 | 1.493 (0.948, 2.350)  | 0.083  |                        |        |
| 4a                                                | 2.347 (1.425, 3.864)  | 0.001  |                        |        |
| 4b                                                | 3.615 (2.011, 6.499)  | <0.001 |                        |        |
| <b>N stage</b>                                    |                       |        | NA                     | NA     |
| 0                                                 | 1[Reference]          |        |                        |        |
| 1                                                 | 1.718 (1.305, 2.261)  | <0.001 |                        |        |
| 2                                                 | 1.751 (1.245, 2.464)  | 0.001  |                        |        |
| 3a                                                | 2.854 (1.874, 4.348)  | <0.001 |                        |        |
| 3b                                                | 6.100 (2.949, 12.619) | <0.001 |                        |        |
| <b>Surgery</b>                                    |                       |        |                        |        |
| No                                                | 1[Reference]          |        | 1[Reference]           |        |
| Yes                                               | 0.331 (0.253, 0.432)  | <0.001 | 0.371 (0.271, 0.508)   | <0.001 |
| <b>Receiving chemotherapy or/and radiotherapy</b> |                       |        |                        |        |
| No                                                | 1[Reference]          |        | 1[Reference]           |        |
| Yes                                               | 2.094 (1.658, 2.644)  | <0.001 | 1.043 (0.778, 1.397)   | 0.779  |
| <b>Type</b>                                       |                       |        |                        |        |
| AC                                                | 1[Reference]          |        | 1[Reference]           |        |
| GNEC                                              | 0.675 (0.509, 0.896)  | 0.006  | 0.725 (0.535, 0.981)   | 0.037  |

**Supplementary Table S9. Baseline Clinicopathologic Characteristics of White Patients with Distant Metastatic Stage Gastric Neuroendocrine Carcinoma and Adenocarcinoma in the Unmatched Data**

|                                                   | No. (%)       | No. (%)       | P      |
|---------------------------------------------------|---------------|---------------|--------|
|                                                   | NEC (101)     | AC (2458)     |        |
| <b>Characteristic</b>                             |               |               |        |
| <b>Age, median (IQR)</b>                          | 65 (51-73)    | 65 (56-74)    | 0.255  |
| <b>Sex</b>                                        |               |               | <0.001 |
| Men                                               | 58 (57.4)     | 1800 (73.2)   |        |
| Women                                             | 43 (42.6)     | 658 (26.8)    |        |
| <b>Tumor location</b>                             |               |               | 0.147  |
| Proximal                                          | 44 (43.6)     | 1342 (54.6)   |        |
| Middle                                            | 23 (22.8)     | 433 (17.6)    |        |
| Distal                                            | 17 (16.8)     | 320 (13.0)    |        |
| Mix                                               | 6 (5.9)       | 185 (7.5)     |        |
| Unknown                                           | 11 (10.9)     | 178 (7.2)     |        |
| <b>Tumor size, median (IQR), cm</b>               | 5.0 (3.0-7.3) | 5.0 (3.5-7.5) | 0.286  |
| <b>T stage</b>                                    |               |               | <0.001 |
| 1                                                 | 16 (15.8)     | 651 (26.5)    |        |
| 2                                                 | 25 (24.8)     | 161 (6.6)     |        |
| 3                                                 | 22 (21.8)     | 719 (29.3)    |        |
| 4a                                                | 12 (11.9)     | 390 (15.9)    |        |
| 4b                                                | 26 (25.7)     | 537 (21.8)    |        |
| <b>N stage</b>                                    |               |               | 0.085  |
| 0                                                 | 41 (40.6)     | 685 (27.9)    |        |
| 1                                                 | 44 (43.6)     | 1189 (48.4)   |        |
| 2                                                 | 9 (8.9)       | 340 (13.8)    |        |
| 3a                                                | 6 (5.9)       | 214 (8.7)     |        |
| 3b                                                | 1 (1.0)       | 30 (1.2)      |        |
| <b>Surgery</b>                                    |               |               | 0.639  |
| No                                                | 67 (66.3)     | 1685 (68.6)   |        |
| Yes                                               | 34 (33.7)     | 773 (31.4)    |        |
| <b>Receiving chemotherapy or/and radiotherapy</b> |               |               | 0.002  |
| No                                                | 41 (40.6)     | 649 (26.4)    |        |
| Yes                                               | 60 (59.4)     | 1809 (73.6)   |        |

**Supplementary Table S10. Baseline Clinicopathologic Characteristics of White Patients with Distant Metastatic Stage Gastric Neuroendocrine Carcinoma and Adenocarcinoma in the Matched Data**

|                                                   | No. (%)<br>NEC (99) | No. (%)<br>AC (277) | P      |
|---------------------------------------------------|---------------------|---------------------|--------|
| <b>Characteristic</b>                             |                     |                     |        |
| <b>Age, median (IQR)</b>                          | 65 (51-73)          | 67 (54-73)          | 0.710  |
| <b>Sex</b>                                        |                     |                     | 0.539  |
| Men                                               | 58 (58.6)           | 172 (62.1)          |        |
| Women                                             | 41 (41.4)           | 105 (37.9)          |        |
| <b>Tumor location</b>                             |                     |                     | 0.789  |
| Proximal                                          | 43 (43.4)           | 132 (47.7)          |        |
| Middle                                            | 23 (23.2)           | 58 (20.9)           |        |
| Distal                                            | 16 (16.2)           | 38 (13.7)           |        |
| Mix                                               | 6 (6.1)             | 24 (8.7)            |        |
| Unknown                                           | 11 (11.1)           | 25 (9.0)            |        |
| <b>Tumor size, median (IQR), cm</b>               | 5.0 (3.0-7.3)       | 5.0 (3.0-6.8)       | 0.350  |
| <b>T stage</b>                                    |                     |                     | <0.001 |
| 1                                                 | 16 (16.2)           | 91 (32.9)           |        |
| 2                                                 | 23 (23.2)           | 13 (4.7)            |        |
| 3                                                 | 22 (22.2)           | 75 (27.1)           |        |
| 4a                                                | 12 (12.1)           | 43 (15.5)           |        |
| 4b                                                | 26 (26.3)           | 55 (19.9)           |        |
| <b>N stage</b>                                    |                     |                     | 0.476  |
| 0                                                 | 40 (40.4)           | 85 (30.7)           |        |
| 1                                                 | 43 (43.4)           | 131 (47.3)          |        |
| 2                                                 | 9 (9.1)             | 35 (12.6)           |        |
| 3a                                                | 6 (6.1)             | 19 (6.9)            |        |
| 3b                                                | 1 (1.0)             | 7 (2.5)             |        |
| <b>Surgery</b>                                    |                     |                     | 0.724  |
| No                                                | 66 (66.7)           | 190 (68.6)          |        |
| Yes                                               | 33 (33.3)           | 87 (31.4)           |        |
| <b>Receiving chemotherapy or/and radiotherapy</b> |                     |                     | 0.708  |
| No                                                | 40 (40.4)           | 106 (38.3)          |        |
| Yes                                               | 59 (59.6)           | 171 (61.7)          |        |

| <b>Supplementary Table S11. Univariable and Multivariable Cox Regression Analyses of Factors Associated with Overall Survival of White Patients with Distant Metastatic Stage Gastric Neuroendocrine Carcinoma and Adenocarcinoma in the Matched Data</b> |                             |          |                               |          |
|-----------------------------------------------------------------------------------------------------------------------------------------------------------------------------------------------------------------------------------------------------------|-----------------------------|----------|-------------------------------|----------|
| <b>Clinicopathological features</b>                                                                                                                                                                                                                       | <b>Univariable analysis</b> |          | <b>Multivariable analysis</b> |          |
|                                                                                                                                                                                                                                                           | <b>HR (95% CI)</b>          | <b>P</b> | <b>HR (95% CI)</b>            | <b>P</b> |
| <b>Age</b>                                                                                                                                                                                                                                                | 1.012 (1.004, 1.020)        | 0.003    | 1.009 (1.001, 1.017)          | 0.026    |
| <b>Sex</b>                                                                                                                                                                                                                                                |                             |          |                               |          |
| Men                                                                                                                                                                                                                                                       | 1[Reference]                |          | 1[Reference]                  |          |
| Women                                                                                                                                                                                                                                                     | 0.891 (0.717, 1.108)        | 0.299    | 0.912 (0.730, 1.140)          | 0.419    |
| <b>Tumor location</b>                                                                                                                                                                                                                                     |                             |          |                               |          |
| Proximal                                                                                                                                                                                                                                                  | 1[Reference]                |          | 1[Reference]                  |          |
| Middle                                                                                                                                                                                                                                                    | 0.990 (0.750, 1.305)        | 0.941    | 1.051 (0.789, 1.399)          | 0.735    |
| Distal                                                                                                                                                                                                                                                    | 1.023 (0.745, 1.406)        | 0.888    | 1.393 (0.998, 1.943)          | 0.051    |
| Mix                                                                                                                                                                                                                                                       | 1.054 (0.701, 1.586)        | 0.800    | 1.396 (0.896, 2.177)          | 0.140    |
| Unknown                                                                                                                                                                                                                                                   | 0.829 (0.564, 1.219)        | 0.341    | 0.968 (0.652, 1.438)          | 0.873    |
| <b>Tumor size</b>                                                                                                                                                                                                                                         | 1.000 (0.999, 1.002)        | 0.789    | 1.000 (0.999, 1.002)          | 0.609    |
| <b>T stage</b>                                                                                                                                                                                                                                            |                             |          | NA                            | NA       |
| 1                                                                                                                                                                                                                                                         | 1[Reference]                |          |                               |          |
| 2                                                                                                                                                                                                                                                         | 0.747 (0.503, 1.109)        | 0.148    |                               |          |
| 3                                                                                                                                                                                                                                                         | 0.769 (0.575, 1.028)        | 0.077    |                               |          |
| 4a                                                                                                                                                                                                                                                        | 1.033 (0.735, 1.452)        | 0.853    |                               |          |
| 4b                                                                                                                                                                                                                                                        | 1.050 (0.779, 1.415)        | 0.751    |                               |          |
| <b>N stage</b>                                                                                                                                                                                                                                            |                             |          | NA                            | NA       |
| 0                                                                                                                                                                                                                                                         | 1[Reference]                |          |                               |          |
| 1                                                                                                                                                                                                                                                         | 1.333 (1.043, 1.704)        | 0.022    |                               |          |
| 2                                                                                                                                                                                                                                                         | 1.028 (0.718, 1.471)        | 0.880    |                               |          |
| 3a                                                                                                                                                                                                                                                        | 1.248 (0.787, 1.977)        | 0.346    |                               |          |
| 3b                                                                                                                                                                                                                                                        | 2.419 (1.172, 4.993)        | 0.017    |                               |          |
| <b>Surgery</b>                                                                                                                                                                                                                                            |                             |          |                               |          |
| No                                                                                                                                                                                                                                                        | 1[Reference]                |          | 1[Reference]                  |          |
| Yes                                                                                                                                                                                                                                                       | 0.648 (0.513, 0.820)        | <0.001   | 0.450 (0.343, 0.590)          | <0.001   |
| <b>Receiving chemotherapy or/and radiotherapy</b>                                                                                                                                                                                                         |                             |          |                               |          |
| No                                                                                                                                                                                                                                                        | 1[Reference]                |          | 1[Reference]                  |          |
| Yes                                                                                                                                                                                                                                                       | 0.640 (0.513, 0.797)        | <0.001   | 0.463 (0.361, 0.594)          | <0.001   |
| <b>Type</b>                                                                                                                                                                                                                                               |                             |          |                               |          |
| AC                                                                                                                                                                                                                                                        | 1[Reference]                |          | 1[Reference]                  |          |
| GNEC                                                                                                                                                                                                                                                      | 0.696 (0.543, 0.892)        | 0.004    | 0.655 (0.508, 0.843)          | 0.001    |

**Supplementary Table S12. Univariable and Multivariable Cox Regression Analyses of Factors Associated with Cancer-specific Survival of White Patients with Distant Metastatic Stage Gastric Neuroendocrine Carcinoma and Adenocarcinoma in the Matched Data**

| Clinicopathological features                      | Univariable analysis |        | Multivariable analysis |        |
|---------------------------------------------------|----------------------|--------|------------------------|--------|
|                                                   | HR (95% CI)          | P      | HR (95% CI)            | P      |
| <b>Age</b>                                        | 1.010 (1.002, 1.018) | 0.012  | 1.007 (0.999, 1.015)   | 0.069  |
| <b>Sex</b>                                        |                      |        |                        |        |
| Men                                               | 1[Reference]         |        | 1[Reference]           |        |
| Women                                             | 0.903 (0.724, 1.127) | 0.368  | 0.934 (0.745, 1.171)   | 0.555  |
| <b>Tumor location</b>                             |                      |        |                        |        |
| Proximal                                          | 1[Reference]         |        | 1[Reference]           |        |
| Middle                                            | 0.982 (0.741, 1.301) | 0.899  | 1.054 (0.788, 1.409)   | 0.725  |
| Distal                                            | 0.961 (0.692, 1.335) | 0.813  | 1.322 (0.937, 1.865)   | 0.111  |
| Mix                                               | 0.991 (0.649, 1.512) | 0.966  | 1.314 (0.830, 2.079)   | 0.244  |
| Unknown                                           | 0.854 (0.581, 1.257) | 0.424  | 1.005 (0.677, 1.493)   | 0.980  |
| <b>Tumor size</b>                                 | 1.000 (0.999, 1.002) | 0.811  | 1.000 (0.999, 1.002)   | 0.649  |
| <b>T stage</b>                                    |                      |        | NA                     | NA     |
| 1                                                 | 1[Reference]         |        |                        |        |
| 2                                                 | 0.704 (0.466, 1.061) | 0.094  |                        |        |
| 3                                                 | 0.752 (0.559, 1.014) | 0.061  |                        |        |
| 4a                                                | 1.075 (0.763, 1.515) | 0.680  |                        |        |
| 4b                                                | 1.074 (0.793, 1.453) | 0.645  |                        |        |
| <b>N stage</b>                                    |                      |        | NA                     | NA     |
| 0                                                 | 1[Reference]         |        |                        |        |
| 1                                                 | 1.409 (1.095, 1.814) | 0.008  |                        |        |
| 2                                                 | 1.077 (0.747, 1.553) | 0.690  |                        |        |
| 3a                                                | 1.274 (0.794, 2.044) | 0.315  |                        |        |
| 3b                                                | 2.591 (1.253, 5.358) | 0.010  |                        |        |
| <b>Surgery</b>                                    |                      |        |                        |        |
| No                                                | 1[Reference]         |        | 1[Reference]           |        |
| Yes                                               | 0.616 (0.483, 0.784) | <0.001 | 0.435 (0.329, 0.575)   | <0.001 |
| <b>Receiving chemotherapy or/and radiotherapy</b> |                      |        |                        |        |
| No                                                | 1[Reference]         |        | 1[Reference]           |        |
| Yes                                               | 0.665 (0.531, 0.834) | <0.001 | 0.473 (0.367, 0.610)   | <0.001 |
| <b>Type</b>                                       |                      |        |                        |        |
| AC                                                | 1[Reference]         |        | 1[Reference]           |        |
| GNEC                                              | 0.689 (0.535, 0.888) | 0.004  | 0.649 (0.501, 0.840)   | 0.001  |

**Supplementary Table S13. Baseline Clinicopathologic Characteristics of East Asian Patients with Gastric Neuroendocrine Carcinoma and Adenocarcinoma in the Unmatched Data**

|                                                   | No. (%)<br>NEC (21) | No. (%)<br>AC (2092) | P     |
|---------------------------------------------------|---------------------|----------------------|-------|
| <b>Characteristic</b>                             |                     |                      |       |
| <b>Age, median (IQR)</b>                          | 69 (60-79)          | 72 (62-79)           | 0.469 |
| <b>Sex</b>                                        |                     |                      | 0.739 |
| Men                                               | 14 (66.7)           | 1321 (63.1)          |       |
| Women                                             | 7 (33.3)            | 771 (36.9)           |       |
| <b>Tumor location</b>                             |                     |                      | 0.135 |
| Proximal                                          | 7 (33.3)            | 294 (14.1)           |       |
| Middle                                            | 4 (19.0)            | 680 (32.5)           |       |
| Distal                                            | 7 (33.3)            | 810 (38.7)           |       |
| Mix                                               | 1 (4.8)             | 165 (7.9)            |       |
| Unknown                                           | 2 (9.5)             | 143 (6.8)            |       |
| <b>Tumor size, median (IQR), cm</b>               | 4.6 (2.8-8.85)      | 4.0 (2.2-6.1)        | 0.185 |
| <b>T stage</b>                                    |                     |                      | 0.797 |
| 1                                                 | 6 (28.6)            | 666 (31.8)           |       |
| 2                                                 | 4 (19.0)            | 232 (11.1)           |       |
| 3                                                 | 6 (28.6)            | 641 (30.6)           |       |
| 4a                                                | 3 (14.3)            | 368 (17.6)           |       |
| 4b                                                | 2 (9.5)             | 185 (8.8)            |       |
| <b>N stage</b>                                    |                     |                      | 0.447 |
| 0                                                 | 11 (52.4)           | 932 (44.6)           |       |
| 1                                                 | 7 (33.3)            | 481 (23.0)           |       |
| 2                                                 | 2 (9.5)             | 319 (15.2)           |       |
| 3a                                                | 1 (4.8)             | 249 (11.9)           |       |
| 3b                                                | 0 (0.0)             | 111 (5.3)            |       |
| <b>M stage</b>                                    |                     |                      | 0.218 |
| 0                                                 | 16 (76.2)           | 1788 (85.5)          |       |
| 1                                                 | 5 (23.8)            | 304 (14.5)           |       |
| <b>TNM stage</b>                                  |                     |                      | 0.464 |
| I                                                 | 6 (28.6)            | 706 (33.7)           |       |
| II                                                | 6 (28.6)            | 474 (22.7)           |       |
| III                                               | 4 (19.0)            | 608 (29.1)           |       |
| IV                                                | 5 (23.8)            | 304 (14.5)           |       |
| <b>Surgery</b>                                    |                     |                      | 0.045 |
| No                                                | 6 (28.6)            | 268 (12.8)           |       |
| Yes                                               | 15 (71.4)           | 1824 (87.2)          |       |
| <b>Receiving chemotherapy or/and radiotherapy</b> |                     |                      | 0.128 |
| No                                                | 15 (71.4)           | 1135 (54.3)          |       |
| Yes                                               | 6 (28.6)            | 957 (45.7)           |       |

**Supplementary Table S14. Baseline Clinicopathologic Characteristic of East Asian Patients with Gastric Neuroendocrine Carcinoma and Adenocarcinoma in the Matched Data**

|                                                   | No. (%)<br>NEC (18) | No. (%)<br>AC (48) | P     |
|---------------------------------------------------|---------------------|--------------------|-------|
| <b>Characteristic</b>                             |                     |                    |       |
| <b>Age, median (IQR)</b>                          | 69.5 (64-80.25)     | 71 (62-84)         | 0.948 |
| <b>Sex</b>                                        |                     |                    | 0.319 |
| Men                                               | 13 (72.2)           | 40 (83.3)          |       |
| Women                                             | 5 (27.8)            | 8 (16.7)           |       |
| <b>Tumor location</b>                             |                     |                    | 0.142 |
| Proximal                                          | 6 (33.3)            | 4 (8.3)            |       |
| Middle                                            | 4 (22.2)            | 20 (41.7)          |       |
| Distal                                            | 6 (33.3)            | 17 (35.4)          |       |
| Mix                                               | 1 (5.6)             | 4 (8.3)            |       |
| Unknown                                           | 1 (5.6)             | 3 (6.3)            |       |
| <b>Tumor size, median (IQR), cm</b>               | 5.250 (2.825-8.775) | 2.5 (1.5-6.025)    | 0.044 |
| <b>T stage</b>                                    |                     |                    | 0.906 |
| 1                                                 | 5 (27.8)            | 14 (29.2)          |       |
| 2                                                 | 4 (22.2)            | 6 (12.5)           |       |
| 3                                                 | 5 (27.8)            | 16 (33.3)          |       |
| 4a                                                | 2 (11.1)            | 7 (14.6)           |       |
| 4b                                                | 2 (11.1)            | 5 (10.4)           |       |
| <b>N stage</b>                                    |                     |                    | 0.792 |
| 0                                                 | 9 (50.0)            | 22 (45.8)          |       |
| 1                                                 | 6 (33.3)            | 12 (25.0)          |       |
| 2                                                 | 2 (11.1)            | 5 (10.4)           |       |
| 3a                                                | 1 (5.6)             | 8 (16.7)           |       |
| 3b                                                | 0 (0.0)             | 1 (2.1)            |       |
| <b>M stage</b>                                    |                     |                    | 0.739 |
| 0                                                 | 14 (77.8)           | 39 (81.3)          |       |
| 1                                                 | 4 (22.2)            | 9 (18.8)           |       |
| <b>TNM stage</b>                                  |                     |                    | 0.981 |
| I                                                 | 5 (27.8)            | 13 (27.1)          |       |
| II                                                | 5 (27.8)            | 16 (33.3)          |       |
| III                                               | 4 (22.2)            | 10 (20.8)          |       |
| IV                                                | 4 (22.2)            | 9 (18.8)           |       |
| <b>Surgery</b>                                    |                     |                    | 0.751 |
| No                                                | 5 (27.8)            | 11 (22.9)          |       |
| Yes                                               | 13 (72.2)           | 37 (77.1)          |       |
| <b>Receiving chemotherapy or/and radiotherapy</b> |                     |                    | 0.778 |
| No                                                | 12 (66.7)           | 29 (60.4)          |       |
| Yes                                               | 6 (33.3)            | 19 (39.6)          |       |

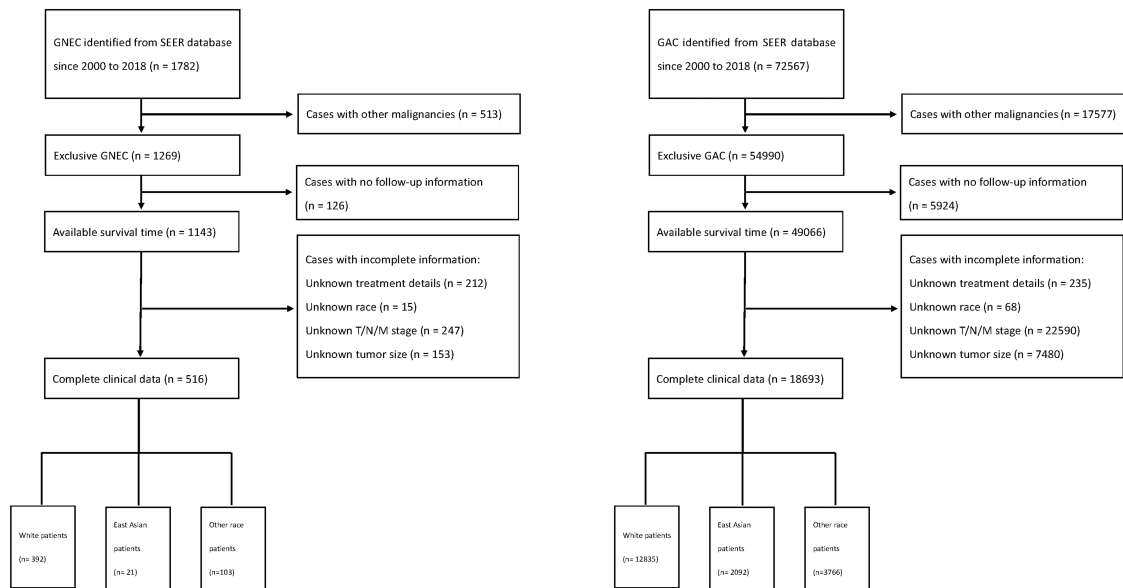

**Supplementary Figure S1.** Schematic overview for patients identification

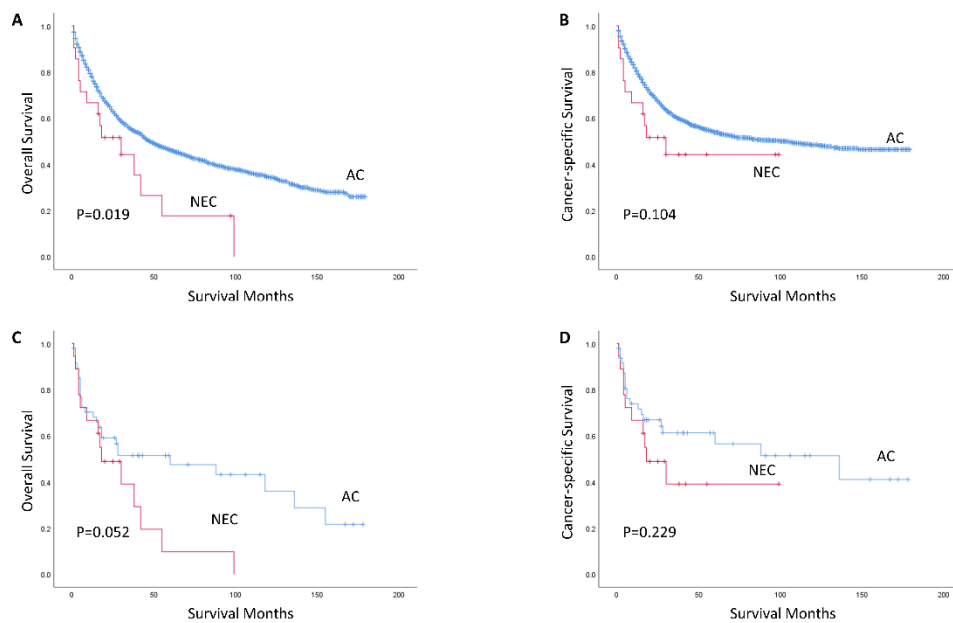

**Supplementary Figure S2.** Kaplan Meier Survival Curves for East Asian Patients with Gastric Neuroendocrine Carcinoma and Adenocarcinoma before (A: OS; B: CSS) and after PSM (C: OS; D: CSS)
